# Supplementary material for: Facile manufacture of porous organic framework membranes for precombustion CO2 capture
Source: PubMed Central journal article supplement — Sci Adv. 2018 Sep 21;4(9):eaau1698. doi: 10.1126/sciadv.aau1698 (PMC6155097; doi:10.1126/sciadv.aau1698), 2018-09-21
Supplement: aau1698_SM.pdf [file aau1698_SM.pdf]

## Supplementary Materials for

### Facile manufacture of porous organic framework membranes for precombustion CO<sub>2</sub> capture

Meixia Shan, Xinlei Liu\*, Xuerui Wang, Irina Yarulina, Beatriz Seoane, Freek Kapteijn, Jorge Gascon\*

\*Corresponding author. Email: x.liu-8@tudelft.nl (X.L.); jorge.gascon@kaust.edu.sa (J.G.)

Published 21 September 2018, *Sci. Adv.* **4**, eaau1698 (2018)

DOI: 10.1126/sciadv.aau1698

#### This PDF file includes:

Scheme S1. Diagram of gas permeation apparatus used in this work.

Fig. S1. Digital photo of the prepared membranes under four different conditions.

Fig. S2. Description of freestanding BILP-101x film synthesis process and resulting films.

Fig. S3. Morphology of the prepared BILP-101x film.

Fig. S4. AFM analysis of the BILP-101x film under A3 conditions.

Fig. S5. Characterization of the BILP-101x film prepared under A3 conditions.

Fig. S6. Effect of the temperature on the membrane separation performance toward H<sub>2</sub>/CO<sub>2</sub>.

Fig. S7. Effect of pressure on the membrane performance toward H<sub>2</sub>/CO<sub>2</sub>.

Fig. S8. Characterization of the BILP-101x film prepared under A1 and A2 conditions.

Table S1. Summary of membrane preparation conditions.

Table S2. Summary of membrane separation performance tested for H<sub>2</sub>/CO<sub>2</sub>.

Table S3. Summary of membrane separation performance tested for H<sub>2</sub>/N<sub>2</sub>.

Table S4. Membrane performance of typical PIM, TR polymer, PBI, and BILP presented in Fig. 3A.

Table S5. Membrane performance of some pure COF membranes for H<sub>2</sub>/N<sub>2</sub> separation.

References (35–47)

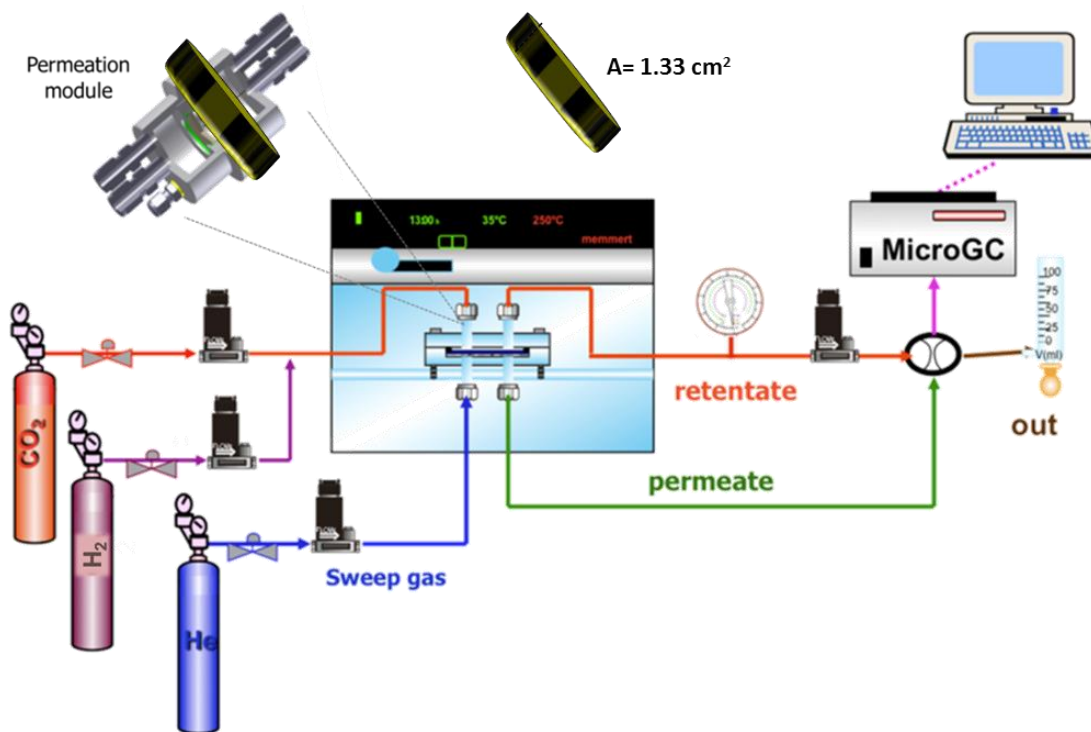

**Scheme S1. Diagram of gas permeation apparatus used in this work.**

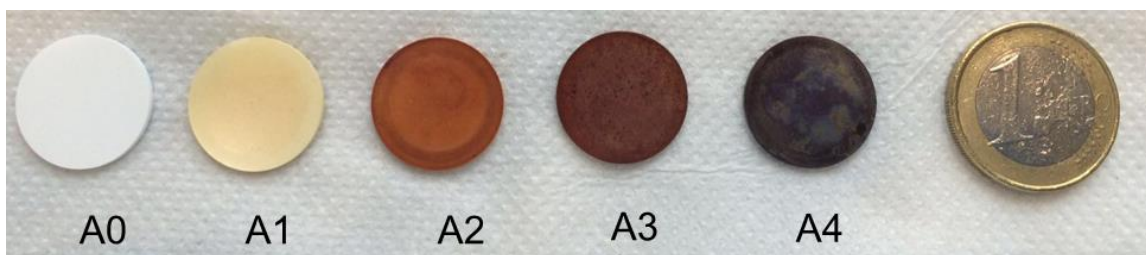

**Fig. S1. Digital photo of the prepared membranes under four different conditions.**

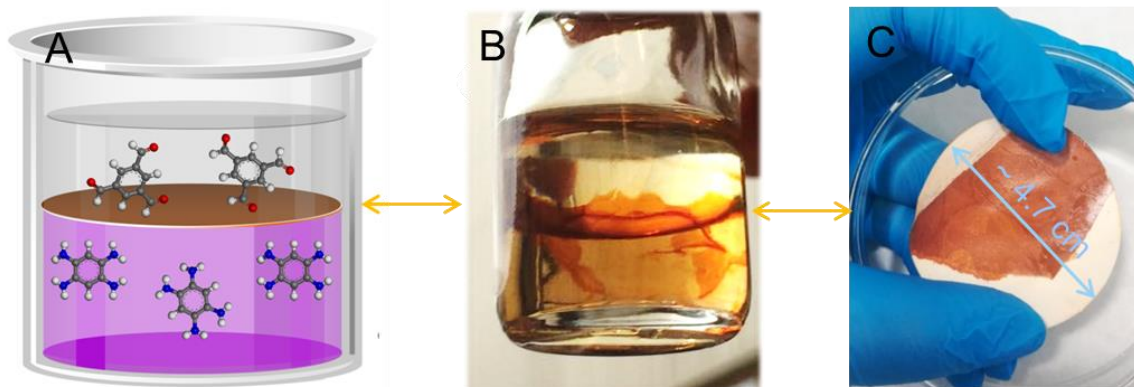

**Fig. S2. Description of freestanding BILP-101x film synthesis process and resulting films.** (A) synthesis process of BILP-101x film. (B) Photograph of the film formed at the water-benzene interface, and (C), the film supported on a nylon substrate. The diameter of nylon support is 4.7 cm.

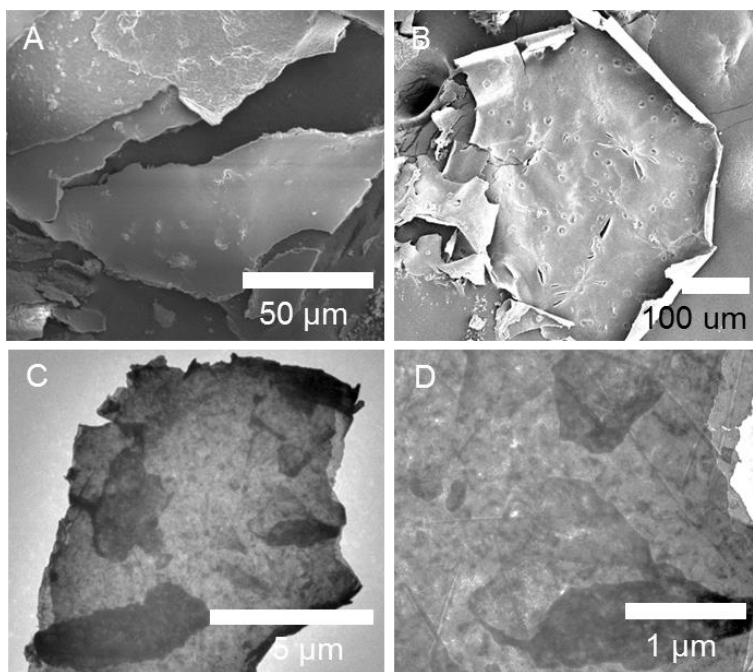

**Fig. S3. Morphology of the prepared BILP-101x film.** (A and B) are low resolution SEM images of the films. (C and D) are low resolution TEM images.

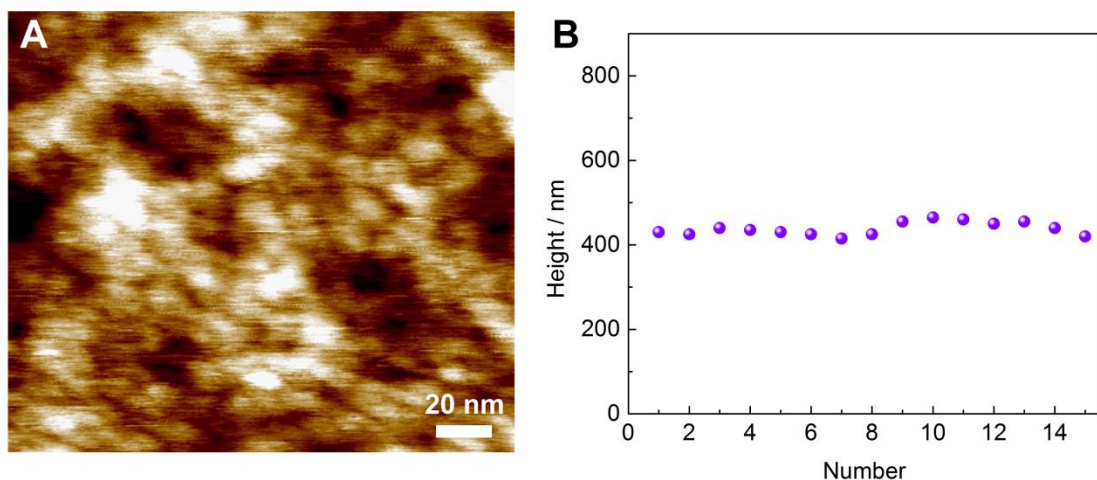

**Fig. S4. AFM analysis of the BILP-101x film under A3 conditions. (A)** AFM image of one piece of BILP-101x film and **(B)** two dimensional (2D) distribution of the height of BILP-101x film used in Fig.1E.

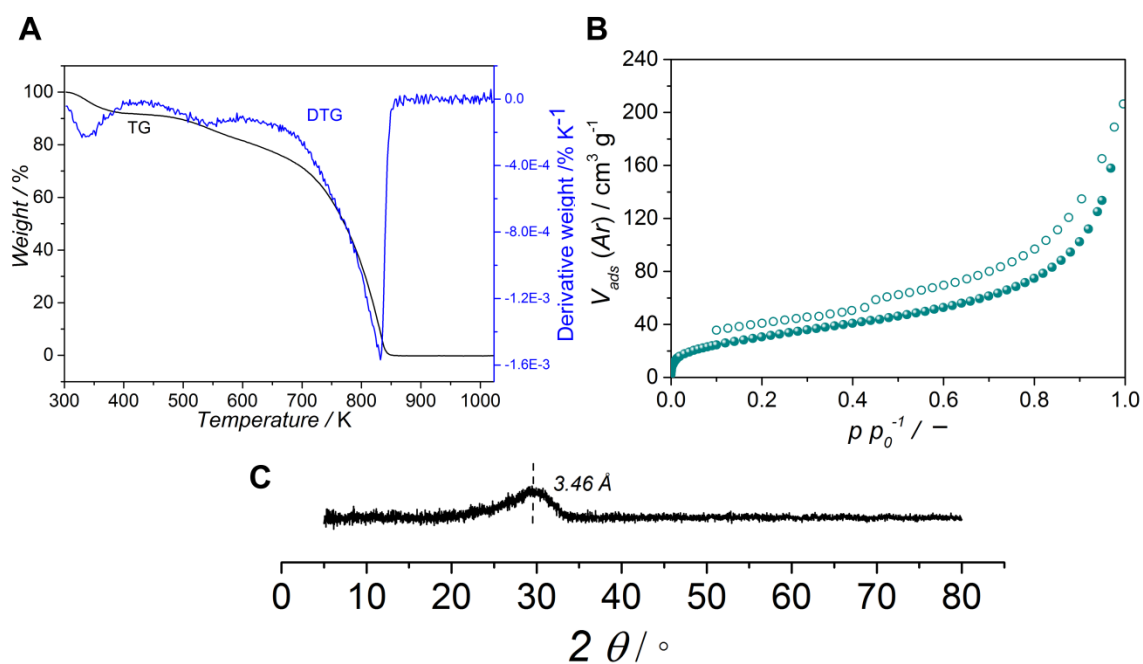

**Fig. S5. Characterization of the BILP-101x film prepared under A3 conditions. (A)** TG and DTG profile of BILP-101x film under air flow (100 mL/ min) at a heating rate of 5 K/ min. **(B)** Argon adsorption isotherms of BILP-101x film at 87 K. **(C)** Powder X-ray diffraction pattern of the free standing BILP-101x film.

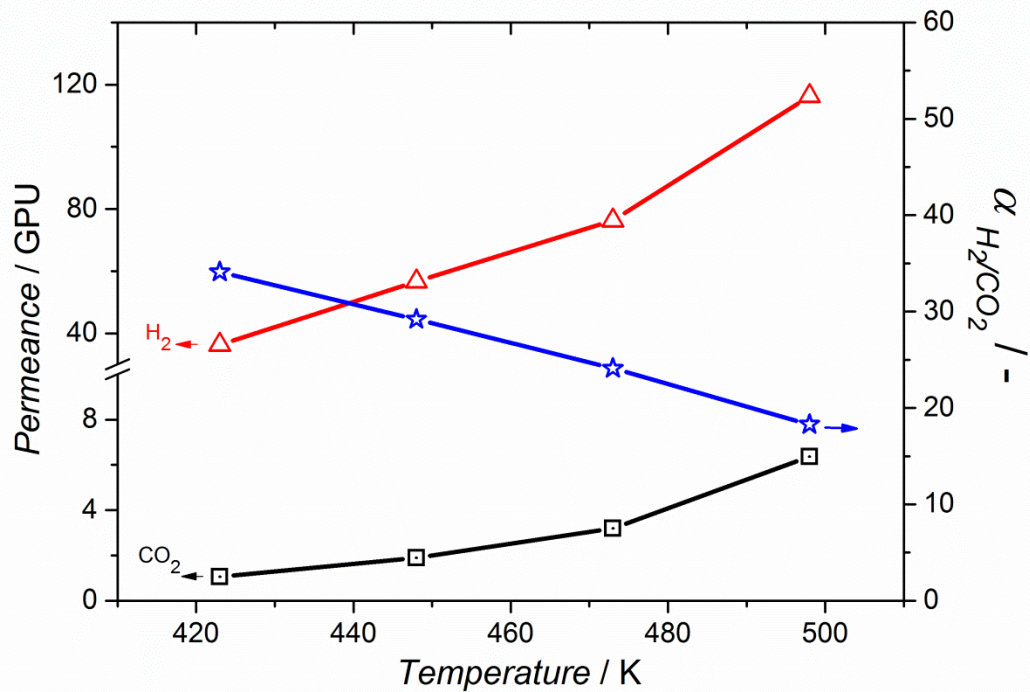

**Fig. S6. Effect of the temperature on the membrane separation performance toward H<sub>2</sub>/CO<sub>2</sub>.** H<sub>2</sub>/CO<sub>2</sub> feed ratio = 1, sweep gas helium, no absolute pressure difference across the membrane. Results are obtained for sample A3-2.

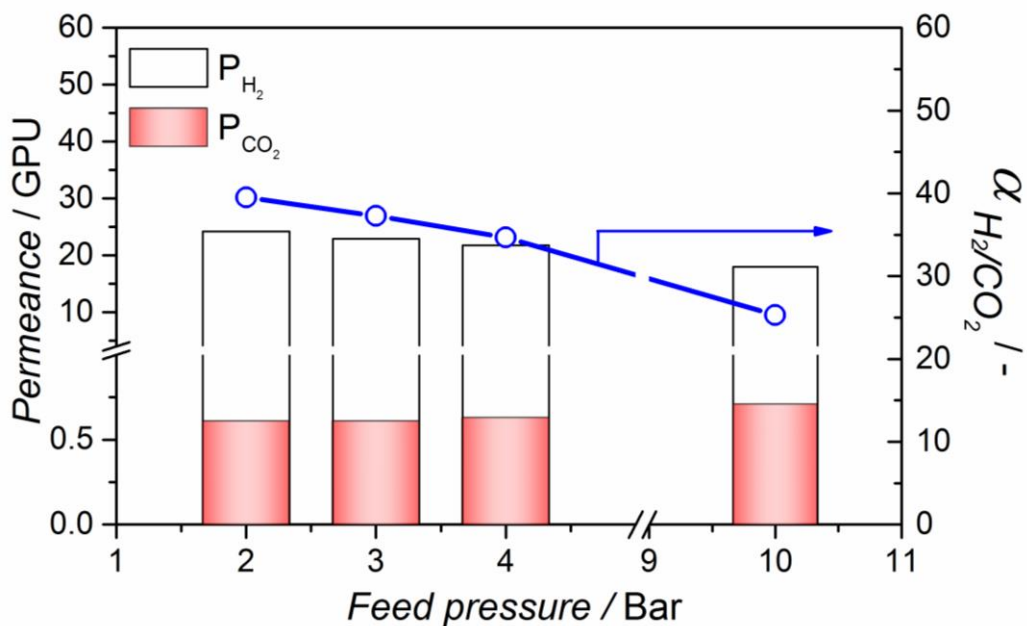

**Fig. S7. Effect of pressure on the membrane performance toward H<sub>2</sub>/CO<sub>2</sub>.** H<sub>2</sub>/CO<sub>2</sub> feed ratio = 1, sweep gas helium. Results are obtained for sample A3-1 under 423 K.

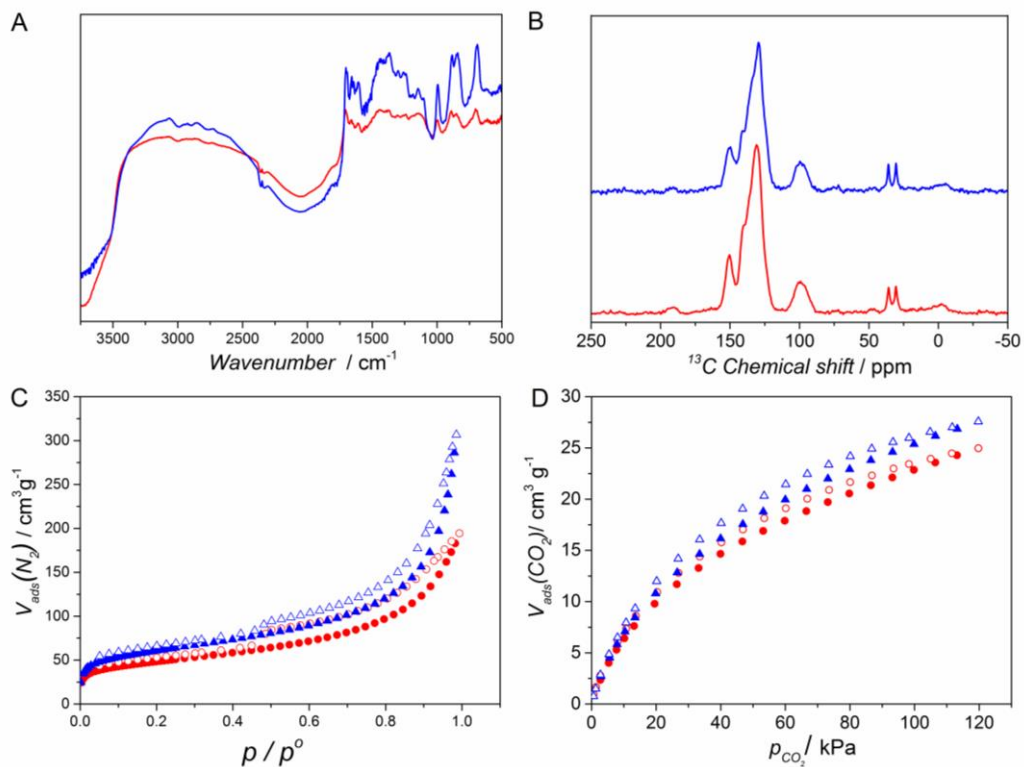

**Fig. S8. Characterization of the BILP-101x film prepared under A1 and A2 conditions.** (A and B) DRIFT-IR and  $^{13}\text{C}$  CP/MAS spectra of films. (C and D)  $\text{N}_2$  and  $\text{CO}_2$  adsorption (solid symbols) and desorption (open symbols) isotherms of the films at 77 and 298 K, respectively. Red and blue corresponds to samples A1 and A2, respectively.

**Table S1. Summary of membrane preparation conditions.** \* Two samples were prepared under A3 conditions, marked in the text as A3-1, A3-2 for distinction.

---

Interfacial polymerization (IP) conditions

| Membranes  | Aqueous amine phase [wt.%] | Aldehyde in benzene phase [wt.%] | IP time (min) | layers |
|------------|----------------------------|----------------------------------|---------------|--------|
| <b>A1</b>  | 0.3                        | 0.1                              | 60            | 1      |
| <b>A2</b>  | 0.75                       | 0.25                             | 60            | 1      |
| <b>A3*</b> | 1.5                        | 0.5                              | 60            | 1      |
| <b>A4</b>  | 1.5                        | 0.5                              | 60            | 2      |

---



**Table S2. Summary of membrane separation performance tested for H<sub>2</sub>/CO<sub>2</sub>.** The membranes were tested at 423 K using an equimolar H<sub>2</sub>/CO<sub>2</sub> mixture. The data were obtained for different membranes under varied feed pressure conditions. Permeate side at atmospheric pressure with helium as sweep gas.

| Membrane        | Sample A1       |                  |                                                 |                                                |
|-----------------|-----------------|------------------|-------------------------------------------------|------------------------------------------------|
| $P_{H_2}$ [GPU] | $P_{N_2}$ [GPU] | $P_{CO_2}$ [GPU] | Selectivity [H <sub>2</sub> /CO <sub>2</sub> -] | Selectivity [H <sub>2</sub> /N <sub>2</sub> -] |
| 18397           | 5508            | 5298             | 3.5                                             | 3.3                                            |

  

| Membrane                                        | Sample A2 |      |      |      |
|-------------------------------------------------|-----------|------|------|------|
| Feed pressure [bar]                             | 2         | 3    | 4    | 10   |
| $P_{H_2}$ [GPU]                                 | 23.5      | 22.8 | 22.7 | 20.8 |
| $P_{CO_2}$ [GPU]                                | 2.43      | 2.40 | 2.47 | 2.40 |
| Selectivity [H <sub>2</sub> /CO <sub>2</sub> -] | 9.7       | 9.5  | 9.2  | 8.7  |

  

| Membrane                                        | Sample A3-1 |      |      |      |
|-------------------------------------------------|-------------|------|------|------|
| Feed pressure [bar]                             | 2           | 3    | 4    | 10   |
| $P_{H_2}$ [GPU]                                 | 24.2        | 22.9 | 21.8 | 18.0 |
| $P_{CO_2}$ [GPU]                                | 0.61        | 0.61 | 0.63 | 0.71 |
| Selectivity [H <sub>2</sub> /CO <sub>2</sub> -] | 39.7        | 37.5 | 34.6 | 25.4 |

  

| Membrane                                        | Sample A4 |      |      |
|-------------------------------------------------|-----------|------|------|
| Feed pressure [bar]                             | 2         | 3    | 4    |
| $P_{H_2}$ [GPU]                                 | 14.7      | 13.7 | 13.0 |
| $P_{CO_2}$ [GPU]                                | 0.68      | 0.67 | 0.68 |
| Selectivity [H <sub>2</sub> /CO <sub>2</sub> -] | 21.6      | 20.4 | 19.1 |



Single gas permeation tests indicate that Sample A1 shows a characteristics of Knudsen diffusion, therefore a mixed-gas test was not performed. For A4 membrane, another layer was grown on top of the first layer (See details in experimental section). As expected, the H<sub>2</sub> permeance decreased due to the thicker layer. For A1, A2 and A3 membranes, the CO<sub>2</sub> permeance decreased with increasing monomer concentration, reflecting the formation of more dense membranes. DRIFT-IR and <sup>13</sup>C CP/MAS spectra of films confirm a similar composition (Fig. S8A and B). Interestingly, the relative intensity of aldehyde groups (~ 1700 cm<sup>-1</sup>) compared to the -C=N- (~1610 cm<sup>-1</sup>) in the imidazole ring in A1 and A2 samples is higher than that in sample A3 (Fig. 2A), indicating more missing links exist in their structures which explains the lower selectivity for sample A1 and A2. This is further supported by the higher porosity of samples A1 and A2 (Fig. S8C) compared to sample A3 (Fig. 2C). Overall, the membrane prepared under A3 conditions exhibits the best performance. Thus, we mainly focus on the discussion of A3 membrane in the main text. Only A2 and A3-1 membrane were further tested for H<sub>2</sub>/N<sub>2</sub> separation.

**Table S3. Summary of membrane separation performance tested for H<sub>2</sub>/N<sub>2</sub>.** The membranes were tested at 423 K using an equimolar H<sub>2</sub>/N<sub>2</sub> mixture. The data were obtained for different membranes under several feed pressure conditions. Permeate side at atmospheric pressure with helium as sweep gas.

| Membrane                                       | Sample A2 |      |      |      |
|------------------------------------------------|-----------|------|------|------|
| Feed pressure [bar]                            | 2         | 3    | 4    | 10   |
| <i>P</i> H <sub>2</sub> [GPU]                  | 20.7      | 20.2 | 19.7 | 17.7 |
| <i>P</i> N <sub>2</sub> [GPU]                  | 0.46      | 0.46 | 0.46 | 0.52 |
| Selectivity [H <sub>2</sub> /N <sub>2</sub> -] | 45.0      | 43.5 | 42.8 | 34.0 |

| Membrane                                       | Sample A3-1 |      |      |      |
|------------------------------------------------|-------------|------|------|------|
| Feed pressure [bar]                            | 2           | 3    | 4    | 10   |
| <i>P</i> H <sub>2</sub> [GPU]                  | 20.8        | 20.3 | 20.2 | 18.0 |
| <i>P</i> N <sub>2</sub> [GPU]                  | 0.24        | 0.22 | 0.22 | 0.24 |
| Selectivity [H <sub>2</sub> /N <sub>2</sub> -] | 86.7        | 92.3 | 91.8 | 75.0 |

**Table S4. Membrane performance of typical PIM, TR polymer, PBI, and BILP presented in Fig. 3A.** The membrane thickness was assumed to be 1  $\mu\text{m}$  when converting the permeability to permeance.

| Membrane material                             |                   | Performance            |                                          | Operation conditions |            |                         | Reference |      |
|-----------------------------------------------|-------------------|------------------------|------------------------------------------|----------------------|------------|-------------------------|-----------|------|
|                                               |                   | $P_{\text{H}_2}$ (GPU) | $\text{H}_2/\text{CO}_2$ selectivity (-) | Type of analysis     | $T$ (K)    | Feed Pressure $P$ (bar) |           |      |
| PIMs                                          | PIM-EA-TB         | 7760                   | 1.09                                     | Single gas           | 298        | 1                       | (7)       |      |
|                                               |                   | 7310                   | 1.43                                     | Single gas           |            |                         |           |      |
|                                               |                   | 6155                   | 1.29                                     | Single gas/aged 24h  |            |                         |           |      |
|                                               | PIM-SBI-TB        | TPIM-1                 | 2200                                     | 0.76                 | Single gas | 298                     | 2         | (35) |
|                                               |                   | TPIM-2                 | 2666                                     | 1.72                 | Single gas |                         |           |      |
|                                               |                   | CoPI-TB-1              | 655                                      | 1.51                 | "          |                         |           |      |
|                                               |                   | CoPI-TB-2              | 249                                      | 1.6                  | Single gas |                         |           |      |
|                                               |                   | CoPI-TB-3              | 403                                      | 1.9                  | "          |                         |           |      |
|                                               |                   | CoPI-TB-4              | 371                                      | 1.9                  | "          |                         |           |      |
|                                               |                   | CoPI-TB-5              | 667                                      | 2.8                  | "          |                         |           |      |
| CoPI-TB-6                                     | 334               | 1.5                    | "                                        |                      |            |                         |           |      |
| TR Polymer                                    | TR-1              | 1200                   | 0.65                                     | Single gas           | 298        | 1                       | (6, 37)   |      |
|                                               | TR-6              | 6000                   | 1.2                                      | "                    |            |                         |           |      |
|                                               | <i>m</i> PBO      | 206                    | 6.2                                      | Single gas           |            |                         |           |      |
|                                               | <i>p</i> PBO,     | 305                    | 3.8                                      | "                    |            |                         |           |      |
|                                               | <i>6</i> PBO      | 505                    | 3.5                                      | "                    |            |                         |           |      |
|                                               | PHBOA(8:2)        | 1.8                    | 8.4                                      | Single gas           |            |                         |           |      |
|                                               | PBOA(8:2)         | 3.4                    | 5.4                                      | "                    |            |                         |           |      |
|                                               | PBOA(5:5)         | 4.2                    | 5.6                                      | "                    |            |                         |           |      |
|                                               | PHBOA(8:2)        | 26.8                   | 8                                        | Single gas           |            |                         |           |      |
|                                               | PBOA(8:2)         | 22.3                   | 6                                        | "                    |            |                         |           |      |
| PBOA(5:5)                                     | 26.9              | 6.5                    | "                                        |                      |            |                         |           |      |
| PBI                                           |                   | 0.09                   | 9                                        | Single gas           | 293        | 3.4                     | (40, 41)  |      |
|                                               |                   | 13                     | 20                                       | Mixed gas            |            |                         |           |      |
|                                               |                   | 11                     | 3                                        | "                    |            |                         |           |      |
|                                               |                   | 3.7                    | 8.6                                      | Single gas           |            |                         |           |      |
|                                               |                   | 2.9                    | 7.1                                      | Mixed gas            |            |                         |           |      |
|                                               |                   | 75                     | 8.6                                      | "                    |            |                         |           |      |
|                                               |                   | 30                     | 3.8                                      | Mixed gas            |            |                         |           |      |
|                                               |                   | 2.9                    | 7.9                                      | Single gas           |            |                         |           |      |
|                                               |                   | 5.5                    | 12.8                                     | "                    |            |                         |           |      |
|                                               |                   | 8.7                    | 21.7                                     | "                    |            |                         |           |      |
|                                               |                   | 22.9                   | 27.3                                     | "                    |            |                         |           |      |
|                                               |                   | 27                     | 16                                       | Single gas           |            |                         |           |      |
| Porous organic polymer (POPs) membranes       | CMPs              | 406                    | 1.8                                      | Single gas           | 303        | 0.1~0.3                 | (46)      |      |
|                                               |                   | 666                    | 1.5                                      | "                    |            |                         |           |      |
|                                               |                   | 364                    | 1.8                                      | "                    |            |                         |           |      |
|                                               |                   | 258                    | 4                                        | "                    |            |                         |           |      |
| BILP-101x (400 nm)                            | Fresh A3-1        | 24.2                   | 39.5                                     | Mixed gas            | 423        | 2                       | This work |      |
|                                               | Fresh A3-2        | 30.1                   | 31.6                                     | "                    |            |                         |           |      |
|                                               | A3-2 <sup>a</sup> | 36.4                   | 34.2                                     | Dry gas mixture      |            |                         |           |      |
|                                               | A3-2 <sup>b</sup> | 25.6                   | 37.6                                     | Wet gas mixture      |            |                         |           |      |
|                                               | A3-1              | 9.7                    | 39.5                                     | Mixed gas            |            |                         |           |      |
|                                               | A3-2              | 12.0                   | 31.6                                     | "                    |            |                         |           |      |
| BILP-101x (assumed 1 $\mu\text{m}$ thickness) | A3-2 <sup>a</sup> | 14.6                   | 34.2                                     | Dry gas mixture      | 423        | 1                       |           |      |
|                                               | A3-2 <sup>b</sup> | 10.2                   | 37.6                                     | Wet gas mixture      |            |                         |           |      |

a and b correspond to A3-2 sample measured after ~800 h on stream under alternating dry gas and wet gas conditions.

**Table S5. Membrane performance of some pure COF membranes for H<sub>2</sub>/N<sub>2</sub> separation.** The membrane thickness was assumed to be 1 μm when converting the permeability to permeance.

| Membrane material |                  | Performance     |                                                | Operation conditions |         |                         | Reference |
|-------------------|------------------|-----------------|------------------------------------------------|----------------------|---------|-------------------------|-----------|
|                   |                  | $P_{H_2}$ (GPU) | H <sub>2</sub> /N <sub>2</sub> selectivity (-) | Type of analysis     | $T$ (K) | Feed Pressure $P$ (bar) |           |
| COFs              | COF-1 nanosheets | 990             | 3.3                                            | Single gas           | 303     | 2                       | (13)      |
|                   |                  | 666             | 4.2                                            | "                    |         |                         |           |
|                   |                  | 560             | 4.1                                            | "                    |         |                         |           |
|                   | COF-320          | 6685            | 3.5                                            | Single gas           | RT      | 2                       | (47)      |
